# Supplementary material for: Expansion of the known distribution of the coastal tailed frog, Ascaphus truei, in British Columbia, Canada, using robust eDNA detection methods
Source: PLOS journal article supplement (doi:10.1371/journal.pone.0213849), 2019-03-14
Supplement: S3 (10.1371/journal.pone.0213849.s003) [file journal.pone.0213849.s003]

**S3 Table. Comparison of historical TCS results with eDNA results for coastal tailed frog.**  
 Historical data from four previous surveys within the region of interest (see Table 1 for details) were paired with eDNA sampling sites when the recorded location was within 2 km of the sampling site.

| Location Name     | Historical coastal tailed frog observed | eDNA result for site | Occurrence                 |
|-------------------|-----------------------------------------|----------------------|----------------------------|
| Ainsworth's Folly | _ <sup>a</sup>                          | Positive             | New                        |
| Ault              | No                                      | Positive             | New                        |
| Blowdown 1        | -                                       | Positive             | New/Confirmed <sup>b</sup> |
| Blowdown 2        | -                                       | Negative             | No                         |
| Boulder           | -                                       | Negative             | No                         |
| Buck              | No                                      | Positive             | New                        |
| Cadwallader 1     | Yes                                     | Positive             | Confirmed                  |
| Cadwallader 2     | No                                      | Positive             | New                        |
| Cadwallader 3     | No                                      | Negative             | No                         |
| Carl              | -                                       | Negative             | No                         |
| Casper            | No                                      | Positive             | New                        |
| Cathy             | -                                       | Positive             | New                        |
| CatSki 1          | No                                      | Positive             | New                        |
| CatSki 2          | -                                       | Positive             | New                        |
| CatSki 3          | Yes                                     | Positive             | Confirmed                  |
| CatSki 4          | Yes                                     | Positive             | Confirmed                  |
| CatSki 5          | -                                       | Positive             | New                        |
| Cayoosh 1         | Yes                                     | Positive             | Confirmed                  |
| Cayoosh 2         | No                                      | Positive             | New                        |
| Channel           | -                                       | Positive             | New/Confirmed <sup>b</sup> |
| Cherise           | No                                      | Positive             | New                        |
| Chism             | No                                      | Negative             | No                         |
| Conroy            | -                                       | Positive             | New                        |
| Copper            | -                                       | Negative             | No                         |
| Crazy             | No                                      | Negative             | No                         |
| Doe               | No                                      | Negative             | No                         |
| Downton 1         | -                                       | Negative             | No                         |
| Downton 2         | No                                      | Positive             | New                        |
| Fran's            | -                                       | Positive             | New                        |
| Gott              | -                                       | Positive             | New                        |
| Great Bear        | -                                       | Positive             | New                        |
| Grey Rock         | No                                      | Positive             | New                        |
| Gwyneth           | -                                       | Positive             | New                        |
| Hawthorne         | Yes                                     | Positive             | Confirmed                  |
| Haylemore 1       | No                                      | Positive             | New                        |
| Haylemore 2       | No                                      | Positive             | New                        |
| Holbrook 1        | -                                       | Negative             | No                         |
| Holbrook 2        | No                                      | Negative             | No                         |
| Hurley 1          | No                                      | Positive             | New                        |
| Hurley 2          | No                                      | Positive             | New                        |
| Hurley 3          | No                                      | Positive             | New                        |
| Hurley 4          | No                                      | Positive             | New                        |
| Hurley 5          | No                                      | Positive             | New                        |
| Ipoo              | No                                      | Positive             | New                        |
| Joce              | -                                       | Negative             | No                         |
| Kane              | -                                       | Negative             | No                         |
| La Mare           | No                                      | Positive             | New                        |
| La Rochelle       | -                                       | Positive             | New                        |
| Little            | -                                       | Positive             | New                        |
| MacGillivray      | No                                      | Positive             | New                        |

|              |     |                                |           |
|--------------|-----|--------------------------------|-----------|
| Marshall     | No  | Negative                       | No        |
| Mason        | No  | Positive                       | New       |
| McParlon     | -   | Positive                       | New       |
| Ochre        | -   | Positive                       | New       |
| Pascall      | -   | Positive                       | New       |
| Paul         | No  | Positive                       | New       |
| Pickup       | Yes | Positive                       | Confirmed |
| Regehr       | Yes | Positive + Visual <sup>c</sup> | Confirmed |
| Sebring      | No  | Negative                       | No        |
| Serpentine   | No  | Positive                       | New       |
| Shulaps 1    | No  | Positive                       | New       |
| Shulaps 2    | -   | Negative                       | No        |
| Sidecar      | Yes | Positive                       | Confirmed |
| Steep        | -   | Positive                       | New       |
| Sucker       | No  | Negative                       | No        |
| Truax 1      | Yes | Positive                       | Confirmed |
| Truax 2      | No  | Positive                       | New       |
| Truax 3      | No  | Positive                       | New       |
| Van Horlick  | No  | Positive                       | New       |
| Washout      | No  | Positive                       | New       |
| Waterfalls   | No  | Positive                       | New       |
| White Saddle | -   | Positive                       | New       |

<sup>a</sup>Not examined within the four historical TCS studies.

<sup>b</sup>Observed outside of the four historical TCS studies (P. Friele and F. Iredale, personal communication).

<sup>c</sup>While sampling for eDNA.
